# Supplementary material
Source: PubMed Central journal article supplement (PMC8451403)

Fig. S1

## The workflow of the NGS data analysis

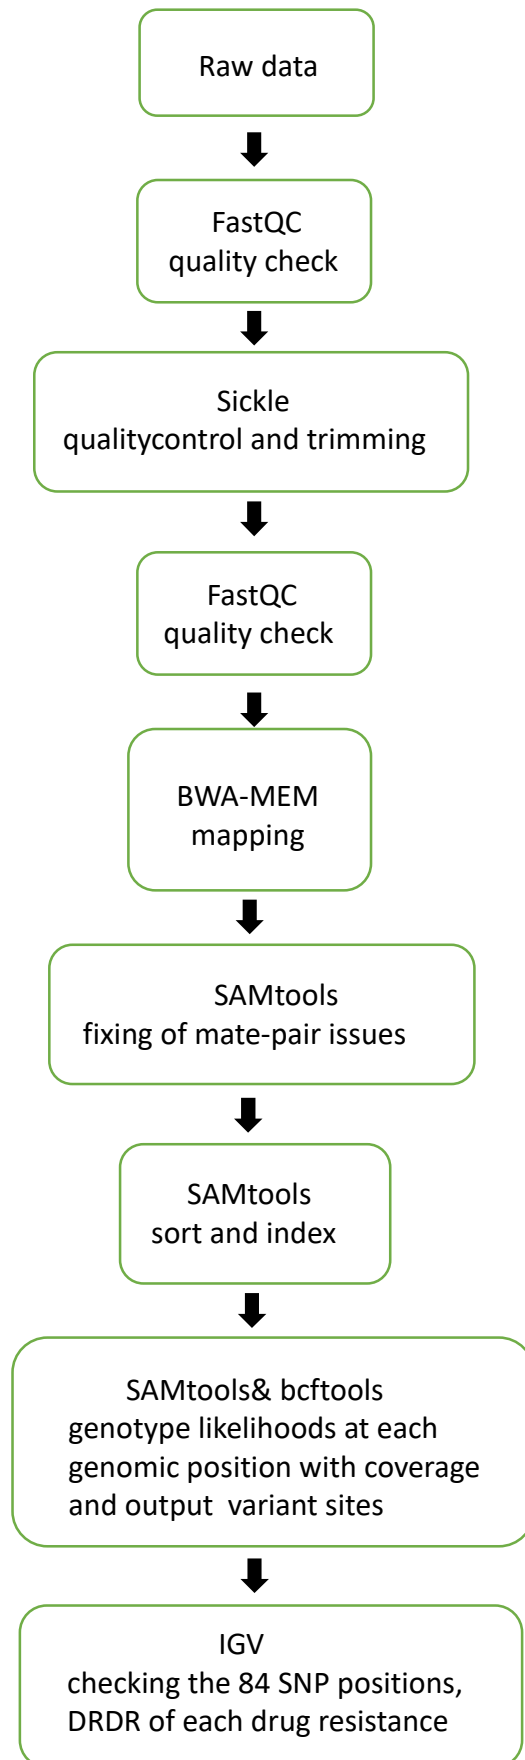

Supplement: jcm.00814-21-s0006.pdf [file jcm.00814-21-s0006.pdf]
